# Supplementary material for: Exopolysaccharides from olive brines could reduce the adhesion of ETEC K88 to intestinal epithelial cells
Source: Royal Society of Chemistry journal article supplement (doi:10.1039/c8fo00690c), 2018-01-01
Supplement: c8fo00690c1.pdf [file c8fo00690c1.pdf]

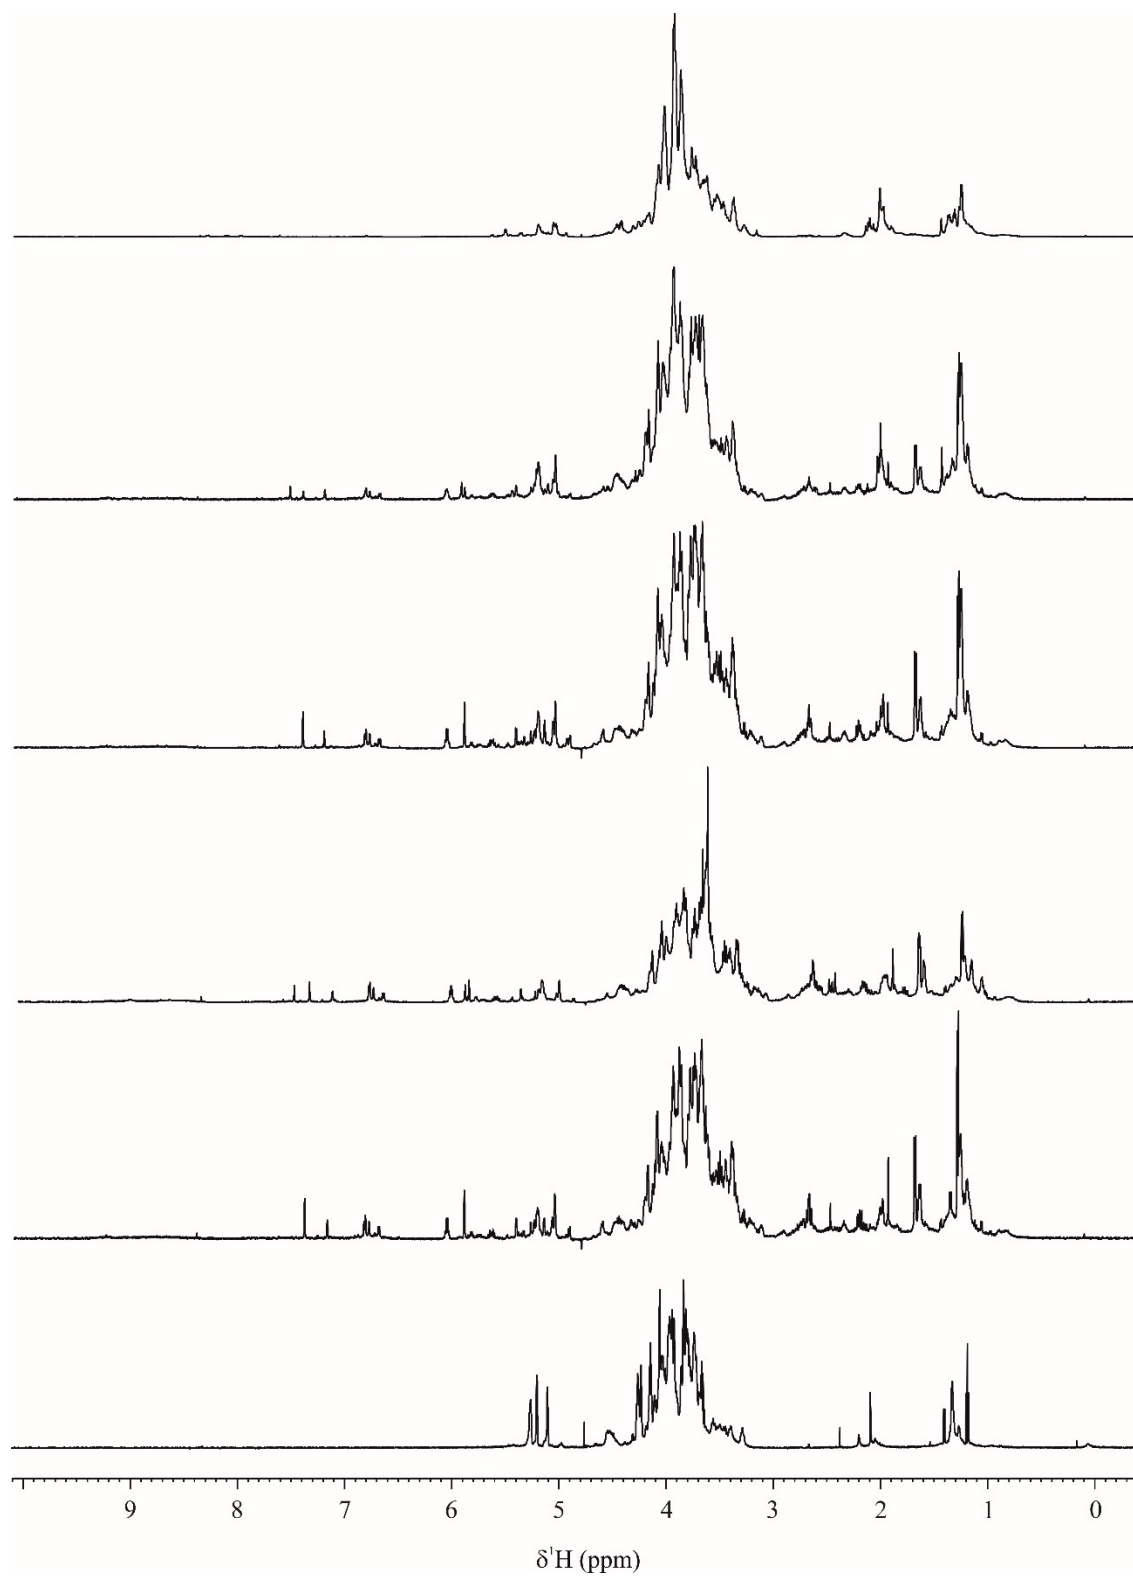

**Fig. S1** 1D <sup>1</sup>H NMR spectrum of samples EPS1 to EPS6 (from top to bottom). Spectrum acquired at a magnetic field of 600 MHz and at 298.0 K.

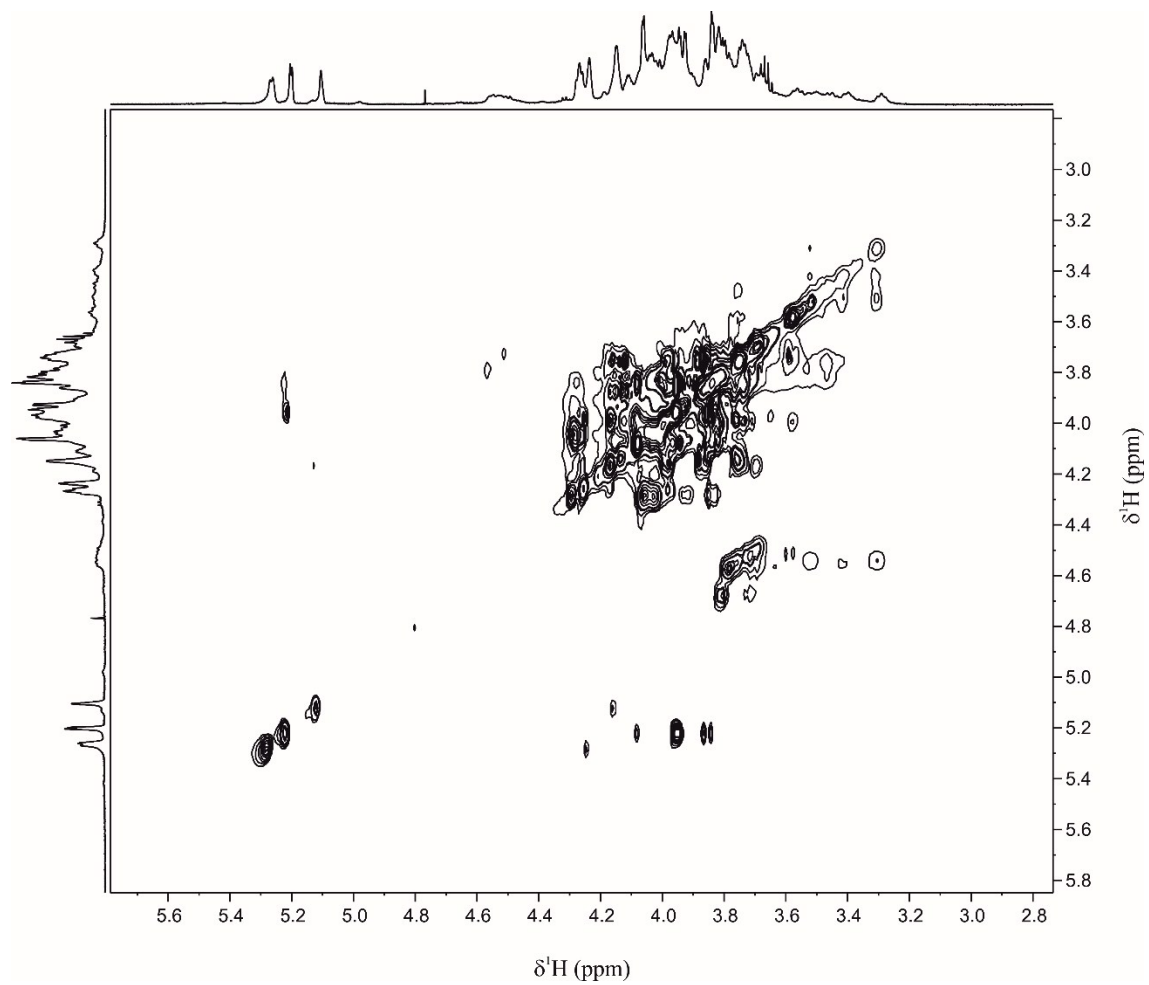

**Fig. S2**  $^1\text{H}$ - $^1\text{H}$  TOCSY spectrum of sample EPS6 acquired at a magnetic field of 600 MHz and at 298.0 K.

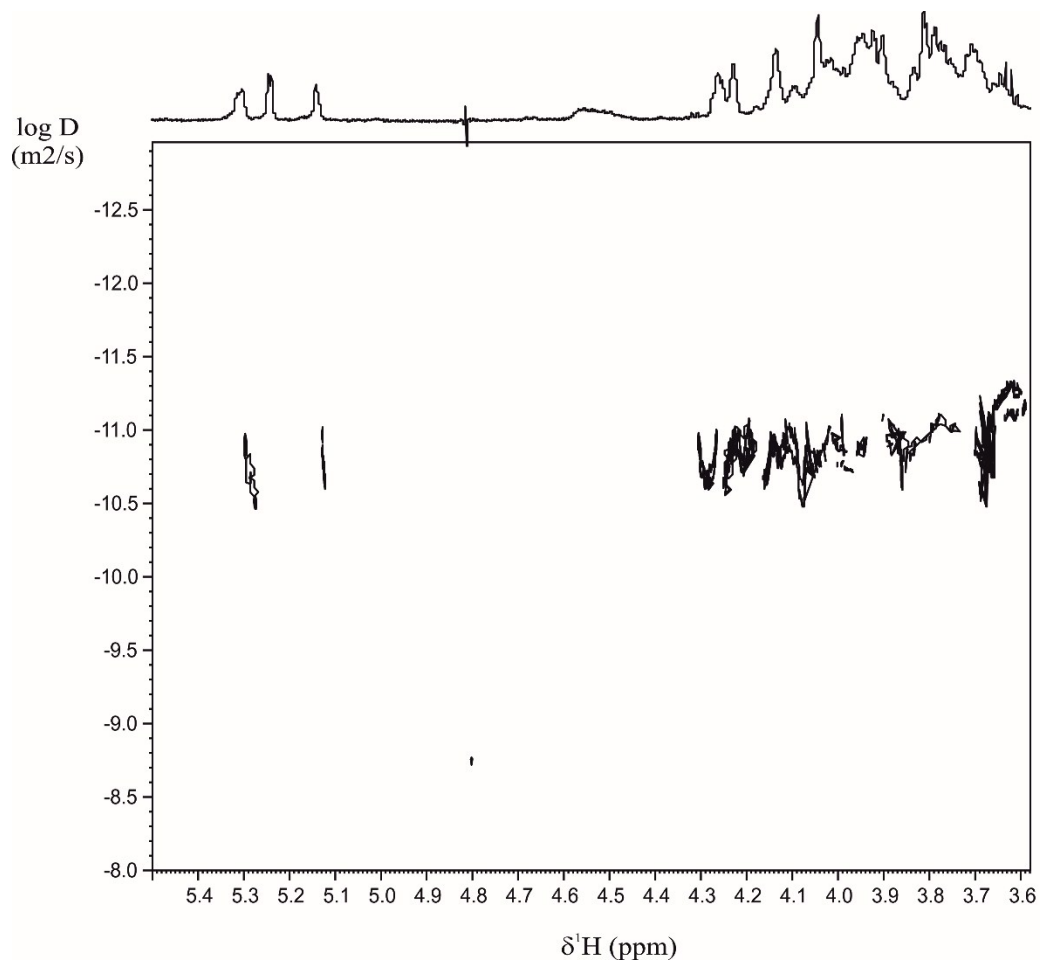

**Fig. S3** 2D DOSY spectrum of sample EPS6 acquired at a magnetic field of 600 MHz and at 298.0 K.
